# Supplementary material for: Knockout of Toll-Like Receptors 2 and 4 Prevents Renal Ischemia-Reperfusion-Induced Cardiac Hypertrophy in Mice
Source: PubMed Central journal article supplement (PMC4598103; doi:10.1371/journal.pone.0139350), 2015-10-08
Supplement: pone.0139350.s001.pdf [file pone.0139350.s001.pdf]

S1 Fig.

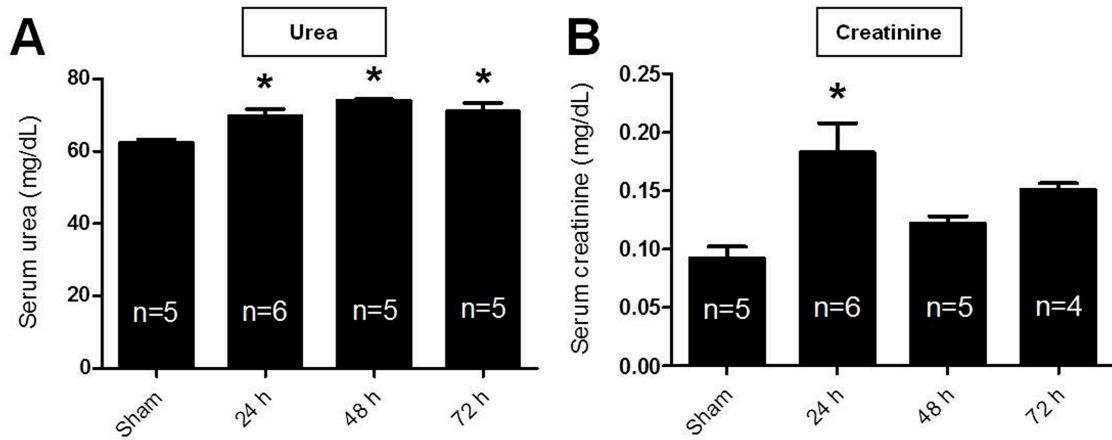

**S1 Fig. Early increase in serum urea and creatinine concentrations after unilateral (left) I/R.** Urea and creatinine were determined (Labtest Diagnóstica kit) in serum from Sham mice 72 h after the surgical intervention, and in I/R mice at the times indicated on the abscissa. Data are mean  $\pm$  SD; number of mice within the bars. \*  $P < 0.05$  when compared to the corresponding Sham (one way ANOVA followed by Bonferroni post-test for selected pairs).
