# Supplementary material for: Knockout of Toll-Like Receptors 2 and 4 Prevents Renal Ischemia-Reperfusion-Induced Cardiac Hypertrophy in Mice
Source: PubMed Central journal article supplement (PMC4598103; doi:10.1371/journal.pone.0139350), 2015-10-08
Supplement: pone.0139350.s002.pdf [file pone.0139350.s002.pdf]

**S1 Table.** List of primers for qRT-PCR experiments.

| Genes               | Forward                    | Reverse                      |
|---------------------|----------------------------|------------------------------|
| Vimentin            | 5'-AGATCGATGTGGACGTTTCC-3' | 5'-TCCGGTACTCGTTTGACTCC-3'   |
| TLR2                | 5'-TGGGCAGTCTTGAACATTTG-3' | 5'-GAAGTCAGCCCAGCAAAATC-3'   |
| TLR4                | 5'-CAGCAAAGTCCCTGATGACA-3' | 5'-TGCCTTGTCTTCAATTGTTTCA-3' |
| MyD88               | 5'-TGTCTCCAGGTGTCCAACAG-3' | 5'-ATCTTCAGGGCAGGGACAA-3'    |
| NF- $\kappa$ B p105 | 5'-CTACGGAAGTGGGCAAATGT-3' | 5'-CACACATAGCGGAATCGAAA-3'   |
| HSP60               | 5'-GCCAAAGGGAAGAACTGTGA-3' | 5'-CGTTTGTGTTATTGGCAACG-3'   |
| HSP70               | 5'-CTGAACCCGCAGAACACC-3'   | 5'-TCTCGCCCTTGTAGTTCACC-3'   |
| $\alpha$ -actin     | 5'-GGCAAGATGAGAGTGCACAA-3' | 5'-CGGAGAATGATGGTCCAGAT-3'   |
| BNP                 | 5'-CAGCTCTTGAAGGACCAAGG-3' | 5'-AGACCCAGGCAGAGTCAGAA-3'   |
